# Supplementary material for: NPP-669, a Novel Broad-Spectrum Antiviral Therapeutic with Excellent Cellular Uptake, Antiviral Potency, Oral Bioavailability, Preclinical Efficacy, and a Promising Safety Margin
Source: PubMed Central journal article supplement — Mol Pharm. 2022 Dec 9;20(1):370–82. doi: 10.1021/acs.molpharmaceut.2c00668 (PMC9811456; doi:10.1021/acs.molpharmaceut.2c00668), 2022-12-09

**Supporting Information 1.** Description of the chemical synthesis depicted in Scheme 1.

**2-((12-Bromododecyl)oxy)tetrahydro-2H-pyran (2).** To a solution of **1** (5.2 g, 19.61 mmol, commercial) and 2,3-dihydro-2H-pyran (2.47 g, 29.4 mmol) in DCM (35 mL) was added pyridinium *p*-toluenesulfonate (PPTS) (0.74 g, 2.94 mmol) at RT. The mixture was stirred for 18 hr at RT. The mixture was concentrated. The residue was taken up in hexanes and purified by a silica gel column (5% EtOAc in hexanes) to give **2** (6.8 g, 99%) as a colorless oil. <sup>1</sup>H NMR (400 MHz, Chloroform-*d*) δ 4.58 (dd, *J* = 4.5, 2.7 Hz, 1H), 3.87 (ddd, *J* = 11.1, 7.4, 3.4 Hz, 1H), 3.73 (dt, *J* = 9.5, 6.9 Hz, 1H), 3.55 - 3.47 (m, 1H), 3.45 - 3.33 (m, 3H), 1.90 - 1.78 (m, 3H), 1.76 - 1.68 (m, 1H), 1.64 - 1.47 (m, 6H), 1.46 - 1.23 (m, 16H).

**2-((13-Cyclobutyltridecyl)oxy)tetrahydro-2H-pyran (3).** To a mixed solution of **2** (3.64 g, 10.42 mmol) in THF (30 mL) and Li<sub>2</sub>CuCl<sub>4</sub> (0.1 M solution in THF, 5.2 mL, 0.522 mmol) at 0°C was added Grignard reagent cyclobutylmethyl)magnesium bromide which was made from (bromomethyl)cyclobutane (4.0 g, 26.8 mmol) and grinded magnesium turnings (1.31 g, 53.7 mmol) in Et<sub>2</sub>O (25 mL). After the addition completed, stirred at 0°C for 30 min and then at RT for 16 hr. The reaction was quenched by NH<sub>4</sub>Cl at 0°C. Stirred at RT for 20 min. Then the mixture was treated with hexanes and water. Organic phase was washed by brine, dried over Na<sub>2</sub>SO<sub>4</sub>, and concentrated to give **3** (3.5 g, 99%) as a colorless oil. <sup>1</sup>H NMR (400 MHz, Chloroform-*d*) δ 4.58 (dd, *J* = 4.5, 2.7 Hz, 1H), 3.87 (ddd, *J* = 11.0, 7.4, 3.4 Hz, 1H), 3.73 (dt, *J* = 9.6, 6.9 Hz, 1H), 3.58 - 3.45 (m, 1H), 3.38 (dt, *J* = 9.6, 6.7 Hz, 1H), 2.23 (dt, *J* = 15.5, 7.8 Hz, 1H), 2.01 (dddd, *J* = 13.6, 6.7, 5.2, 3.0 Hz, 2H), 1.91 - 1.66 (m, 4H), 1.62 - 1.49 (m, 9H), 1.40 - 1.11 (m, 21H).

**13-Cyclobutyltridecan-1-ol (4).** To an emulsion of **3** (3.45 g, 10.2 mmol) in Methanol (20 mL) was added *p*-toluenesulphonic acid monohydrate (97 mg, 0.51 mmol). The mixture was stirred at 40°C for 48 hr. Most of the methanol was removed under reduced pressure. Water (20 mL) was added to the residue and the mixture was extracted with hexane (2 x

40 mL). The combined organic layers were washed with saturated aqueous NaHCO<sub>3</sub> and brine, dried over Na<sub>2</sub>SO<sub>4</sub>, and concentrated under reduced pressure to give **4** (2.42 g, 93%) as a wax-like solid. <sup>1</sup>H NMR (400 MHz, Chloroform-d) δ 3.64 (t, J = 6.6 Hz, 2H), 2.22 (h, J = 7.8 Hz, 1H), 2.08 - 1.92 (m, 2H), 1.80 (tddd, J = 14.8, 11.4, 9.3, 6.4 Hz, 2H), 1.57 (dtd, J = 11.2, 7.4, 6.2, 2.3 Hz, 4H), 1.42 - 1.06 (m, 23H).

**13-Cyclobutyltridecyl methanesulfonate (5)**. Compound **4** (2.4 g, 9.43 mmol) and triethylamine (1.15 g, 11.32 mmol) were dissolved in DCM (30 mL) and the solution was cooled to 0°C. Methanesulfonyl chloride (1.30 g, 11.32 mmol) was added dropwise. The reaction was stirred at RT for 3 hr, quenched with 0.5 N aq HCl and extracted two times with hexanes. The organic layer was then washed with H<sub>2</sub>O, NaHCO<sub>3</sub>, brine, dried over sodium sulfate, filtered, and concentrated under reduced pressure to give **5** (3.0 g, 96%) as a wax-like solid. <sup>1</sup>H NMR (400 MHz, Chloroform-d) δ 4.22 (t, J = 6.6 Hz, 2H), 3.01 (s, 3H), 2.23 (p, J = 7.8 Hz, 1H), 2.07 - 1.93 (m, 2H), 1.87 - 1.68 (m, 4H), 1.61 - 1.52 (m, 2H), 1.42 - 1.12 (m, 22H).

**3-((13-Cyclobutyltridecyl)thio)propan-1-ol (6)**. Under nitrogen, to a solution of **5** (3.0 g, 9.02 mmol) and 3-mercaptoopropan-1-ol (1.25 g, 13.53 mmol) in acetone (30 mL) was added potassium carbonate (2.49 g, 18.04 mmol). The suspension was stirred at 30°C for 16 hr. The mixture was evaporated and the residue was partitioned between water and hexane. The organic phase was washed with 1 N sodium hydroxide, water, brine, dried over sodium sulfate, and the volatiles were removed under vacuum to give **6** (2.9 g, 98%) as a white solid. <sup>1</sup>H NMR (400 MHz, Chloroform-d) δ 3.77 (q, J = 5.4 Hz, 2H), 2.64 (t, J = 7.0 Hz, 2H), 2.53 (dd, J = 8.1, 6.8 Hz, 2H), 2.28 - 2.19 (m, 1H), 2.07 - 1.95 (m, 2H), 1.92 - 1.72 (m, 4H), 1.65 - 1.48 (m, 5H), 1.47 - 1.07 (m, 22H).

**3-((13-Cyclobutyltridecyl)sulfonyl)propan-1-ol (7)**. To a solution of **6** (2.85 g, 8.67 mmol) in AcOH (65 mL) was added 30% H<sub>2</sub>O<sub>2</sub> (17.7 mL, 30%, 173 mmol). The solution

was stirred in the dark at RT for 16 h. The solvent was evaporated under reduced pressure. The white solid residue was treated with DCM and sat. NaHCO<sub>3</sub>. The organic phase was washed by brine, dried over Na<sub>2</sub>SO<sub>4</sub>, and evaporated to afford **7** (2.98 g, 95%) as a white solid. <sup>1</sup>H NMR (400 MHz, Chloroform-d) δ 3.82 (d, J = 5.6 Hz, 2H), 3.17 - 3.07 (m, 2H), 3.00 (d, J = 8.2 Hz, 2H), 2.27 - 2.19 (m, 1H), 2.16 - 2.07 (m, 2H), 2.04 - 1.98 (m, 2H), 1.88 - 1.73 (m, 4H), 1.56 - 1.47 (m, 1H), 1.43 (q, J = 7.3 Hz, 2H), 1.38 - 1.10 (m, 22H).

**3-((13-Cyclobutyltridecyl)sulfonyl)propyl methanesulfonate (8)**. Compound **7** (2.95 g, 8.18 mmol) and triethylamine (0.99 g, 9.82 mmol) were added in DCM (40 mL) and cooled to 0°C. Methanesulfonyl chloride (1.12 g, 9.82 mmol) was added dropwise via syringe to the stirred solution over 2 min. The reaction was stirred at RT for 3 hr, quenched with 0.5 N aq HCl, and extracted 2 times with DCM. The organic layer was then washed with H<sub>2</sub>O, NaHCO<sub>3</sub>, brine, dried over sodium sulfate, filtered, and concentrated under reduced pressure to give **8** (3.3 g, 92%) as a white solid. <sup>1</sup>H NMR (400 MHz, Chloroform-d) δ 4.41 (t, J = 5.9 Hz, 2H), 3.16 - 3.08 (m, 2H), 3.05 (s, 3H), 3.02 - 2.96 (m, 2H), 2.41 - 2.28 (m, 2H), 2.28 - 2.19 (m, 1H), 2.05 - 1.95 (m, 2H), 1.92 - 1.69 (m, 4H), 1.59 - 1.50 (m, 4H), 1.45 (d, J = 7.3 Hz, 1H), 1.29 (d, J = 35.3 Hz, 19H).

**4-Amino-1-(((5S)-2-(3-((13-cyclobutyltridecyl)sulfonyl)propoxy)-2-oxido-1,4,2-dioxaphosphinan-5-yl)methyl)pyrimidin-2(1H)-one (9)**. To a suspension of cCDV-DCMC (cyclic cidofovir-dicyclohexylmorpholinocarboxamidine salt, prepared from cidofovir as described in *ANTIMICROBIAL AGENTS AND CHEMOTHERAPY*, (2002), p. 991-995) (0.270 g, 0.487 mmol) in dry DMF (10 mL) was added **8** (0.534 g, 1.22 mmol) and the mixture was stirred and heated at 80°C for 16 hr. The reaction mixture was then concentrated in vacuo and the soft solid residue was dissolved in 6 ml of 9:1 DCM/MeOH mixed solvent and purified by silica gel preparative TLC plate (9:1 DCM/MeOH) to give **9** (0.147 g, 50%) as a white solid. <sup>1</sup>H NMR (400 MHz, Chloroform-d) δ 7.28 (dd, J = 7.3, 5.6 Hz, 1H), 5.97 (d, J = 7.2 Hz, 1H), 4.39 (dd, J = 11.5, 6.1 Hz, 1H), 4.33 - 4.11 (m, 2H), 4.09

- 4.03 (m, 1H), 3.89 (dd, J = 14.8, 3.0 Hz, 1H), 3.77 (s, 2H), 3.45 (s, 2H), 3.15 (t, J = 7.6 Hz, 1H), 3.07 - 2.96 (m, 2H), 2.25 (dt, J = 15.4, 8.7 Hz, 2H), 2.01 (dt, J = 9.7, 3.8 Hz, 1H), 1.91 - 1.76 (m, 9H), 1.64 - 1.49 (m, 3H), 1.43 (d, J = 7.2 Hz, 1H), 1.37 - 1.15 (m, 20H).  $^{31}\text{P}$  NMR (162 MHz, Chloroform-d)  $\delta$  12.52, 11.12. MS: m/z 604.3185 (M+H) $^+$ , m/z 602.3011 (M-H) $^-$ .

**Ammonium 3-((13-cyclobutyltridecyl)sulfonyl)propyl hydrogen (((S)-1-(4-amino-2-oxopyrimidin-1(2H)-yl)-3-hydroxypropan-2-yl)oxy)methyl)phosphonate (10).**

Compound **9** (0.135 g, 0.224 mmol) was put into a screw-cap reaction tube. Concentrated  $\text{NH}_4\text{OH}$  (28-30%, 15 mL) was added. The reaction tube was screw capped. The suspension mixture was then stirred at 80°C for 18 h. The reaction mixture was then cooled to room temperature and evaporated under reduced pressure at 55°C. The soft solid residue was triturated with acetone, collected by filtration, washed by a small amount of acetone and DCM, and dried under vacuum to give **10** (76 mg, 53%) as white solid.  $^1\text{H}$  NMR (400 MHz, Methanol-d<sub>4</sub>)  $\delta$  7.82 (d, J = 7.5 Hz, 1H), 5.95 (d, J = 7.4 Hz, 1H), 4.13 (dd, J = 14.0, 3.2 Hz, 1H), 3.99 (q, J = 6.2 Hz, 2H), 3.88 - 3.48 (m, 6H), 3.21 (dd, J = 9.6, 6.1 Hz, 2H), 3.16 - 3.04 (m, 2H), 2.24 (dt, J = 16.6, 8.3 Hz, 1H), 2.14 - 1.97 (m, 5H), 1.96 - 1.72 (m, 3H), 1.60 (qd, J = 8.8, 2.5 Hz, 2H), 1.46 (q, J = 7.3 Hz, 2H), 1.40 - 1.09 (m, 20H).  $^{31}\text{P}$  NMR (162 MHz, Methanol-d<sub>4</sub>)  $\delta$  16.13. MS: m/z 622.3294 (M+H) $^+$ , 620.3132 (M-H) $^-$ . HPLC: 97.57%. It is NPP-669.

Supporting Information 2. NPP-669 Certificate of Analysis.

**Chemical Name:** 3-((13-cyclobutyltridecyl)sulfonyl)propyl (S)-(((1-(4-amino-2-oxopyrimidin-1(2H)-yl)-3-hydroxypropan-2-yl)oxy)methyl)phosphonate ammonium (aka. NPP-669)

**Structure:**

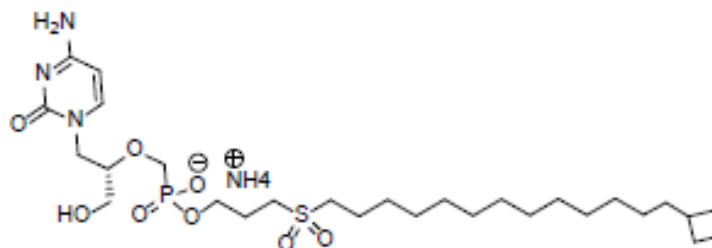

NPP-669

**Formula:** C<sub>28</sub>H<sub>51</sub>N<sub>3</sub>O<sub>8</sub>PS

**Molecular Weight:** 638.31

**Amount:** 3.23 g

**Date Prepared:** 3/29/2021

**Purity:** 96.7 %

**Analyst:** Caitlin Tan

**Appearance:** White solid

**<sup>1</sup>H NMR:** (300 MHz, CD<sub>3</sub>OD) δ 7.68 (d, J=7.0 Hz, 1H), 5.94 (d, J=7.0 Hz, 1H), 4.07 (d, J=10.5 Hz, 1H), 3.97 (q, J=J=6.0 Hz, 2H), 3.82-3.48 (m, 6H), 3.19 (m, 2H), 3.07 (m, 2H), 2.24 (m, 1H), 2.06-1.98 (m, 4H), 1.86-1.77 (m, 4H), 1.74-1.54 (m, 2H), 1.40 (m, 2H), 1.45-1.18 (m, 20H).

**<sup>31</sup>P NMR:** (300 MHz, CD<sub>3</sub>OD): 16.16 ppm (H<sub>3</sub>PO<sub>4</sub>, -0.81 ppm).

**MS:** (ESI positive ion mode) M+1: Calc. 622.2, Found: 622.03.

**HPLC:** Waters XBridge C18 5μm, 4.6x250 mm, gradient: 5-95% of acetonitrile (0.1%

TFA) in H<sub>2</sub>O with 0.1 % TFA, UV 286 nm. R<sub>f</sub>=17.42 min., Purity:96.7 %.

Sample Name: 16909-21a046-FINALS Pulse sequence: PROTON  
Date collected: 2021-03-25 Solvent: cd3od Temperature: 25  
Spectrometer: mercury300-mercury300  
Study owner: walkup  
Operator: walkup

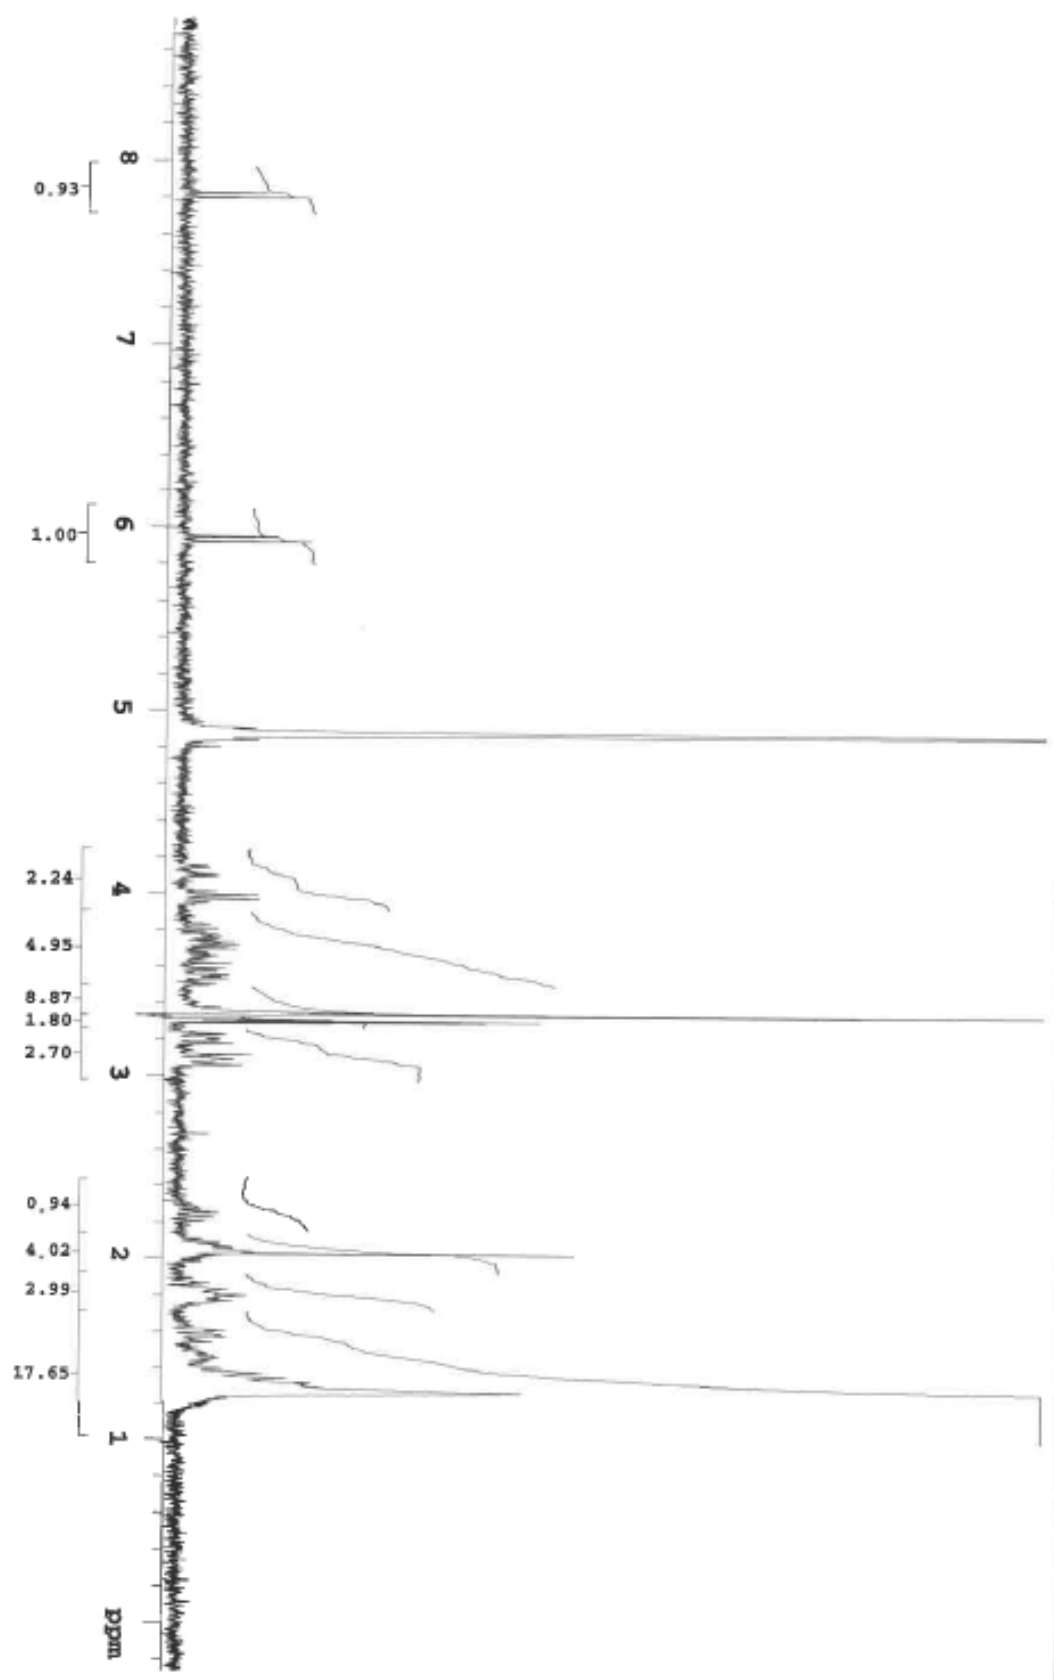

16909-321035-FINAL5

Sample Name 16909-321035-FINAL5  
 Date collected 2021-03-25

Pulse sequence PROTON  
 Solvent cd3od

Temperature 25  
 Spectrometer mercury300-mercury300  
 Study owner walkup  
 Operator walkup

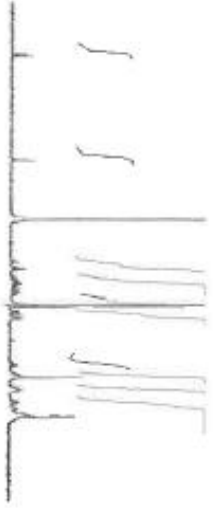

PEAK FREQUENCIES

| Index | freq(ppm) | intensity |
|-------|-----------|-----------|
| 1     | 7.82249   | 11.9717   |
| 2     | 7.79709   | 16.5191   |
| 3     | 5.95116   | 13.6783   |
| 4     | 5.92577   | 18.4543   |
| 5     | 4.90807   | 10.7935   |
| 8     | 4.87486   | 1868.07   |
| 7     | 4.8397    | 11.0724   |
| 9     | 4.80649   | 5.88805   |
| 10    | 4.7404    | 4.30746   |
| 11    | 4.10524   | 5.36072   |
| 12    | 4.09547   | 5.68908   |
| 13    | 4.01147   | 5.49465   |
| 14    | 3.99194   | 11.2209   |
| 15    | 3.97045   | 11.47708  |
| 16    | 3.94897   | 4.26333   |
| 17    | 3.8762    | 4.28942   |
| 18    | 3.81223   | 5.64663   |
| 19    | 3.76535   | 6.25154   |
| 20    | 3.73605   | 7.95592   |
| 21    | 3.71847   | 8.67323   |
| 22    | 3.7048    | 8.24266   |
| 23    | 3.66377   | 5.58895   |
| 24    | 3.6208    | 7.58194   |
| 25    | 3.58933   | 6.85847   |
| 26    | 3.57783   | 5.69973   |
| 27    | 3.55243   | 7.07347   |
| 28    | 3.54071   | 7.12452   |
| 29    | 3.51337   | 5.40117   |
| 30    | 3.49869   | 4.538     |
| 31    | 3.34342   | 440.344   |
| 32    | 3.31412   | 16.4396   |
| 33    | 3.30828   | 22.011    |
| 34    | 3.30436   | 51.6768   |
| 35    | 3.2985    | 43.8495   |
| 36    | 3.29284   | 21.9226   |
| 37    | 3.22013   | 5.79676   |
| 38    | 3.20984   | 6.07735   |
| 39    | 3.17934   | 7.8499    |
| 40    | 3.14488   | 10.4505   |
| 41    | 3.09144   | 7.88186   |
| 42    | 3.06214   | 9.16525   |
| 43    | 2.691     | 4.44145   |
| 44    | 2.2554    | 6.10212   |
| 45    | 2.23196   | 5.41083   |
| 46    | 2.09132   | 5.18731   |
| 47    | 2.03076   | 56.5756   |
| 48    | 1.98473   | 4.79023   |
| 49    | 1.83738   | 7.48057   |
| 50    | 1.80417   | 10.0601   |
| 51    | 1.77292   | 8.02426   |
| 52    | 1.60084   | 7.01148   |
|       | 1.57367   | 7.1973    |

PEAK FREQUENCIES(CONTINUED)

| Index | freq(ppm) | intensity |
|-------|-----------|-----------|
| 54    | 1.48233   | 6.35668   |
| 55    | 1.37639   | 12.4669   |
| 56    | 1.38294   | 15.6518   |
| 57    | 1.27872   | 48.2554   |

16909-321035-FINAL5

SAMPLE

date Mar 26 2021  
 solvent cd3od  
 file Atomwalkup\p\mrs  
 y\data\16909-321035-FIN  
 ALS\_20210325\_01\PROTON\_0  
 1

PRESSATURATION

satmode n  
 wet n

SPECIAL

temp 25.0  
 gain 38  
 rep1 20  
 hd 0.008  
 pw90 11.300  
 dila 10.000

FLAGS

fl n  
 in n  
 dp y  
 rs n

PROCESSING

fn not used

DISPLAY

sp -78.2  
 wp 2708.1  
 rl 600.3  
 rfp 0  
 ip 92.8  
 qp -87.9

PLOT

wo 234  
 so 8  
 vs 18487  
 th 4  
 bl code ph

TRANSMITTER

sw 4800.8  
 at 1.706  
 fo 16384  
 lo 2800  
 lcs 32  
 dt 2.000  
 pt 1024  
 ct 1024

DECOUPLER

in M1  
 stq 300.013  
 tol 283.5  
 hwr 63  
 pw 6.690

WAG\_HCNStarm

dmf 13100

16909-321035-FINAL-P31

Sample Name 16909-321035-FINAL-P31 Pulse sequence PHOSPHORUS Temperature 25 Study center walkup  
Date collected 2021-03-26 Solvent cdcl3d Spectrometer mercury300-mercury300 Operator walkup

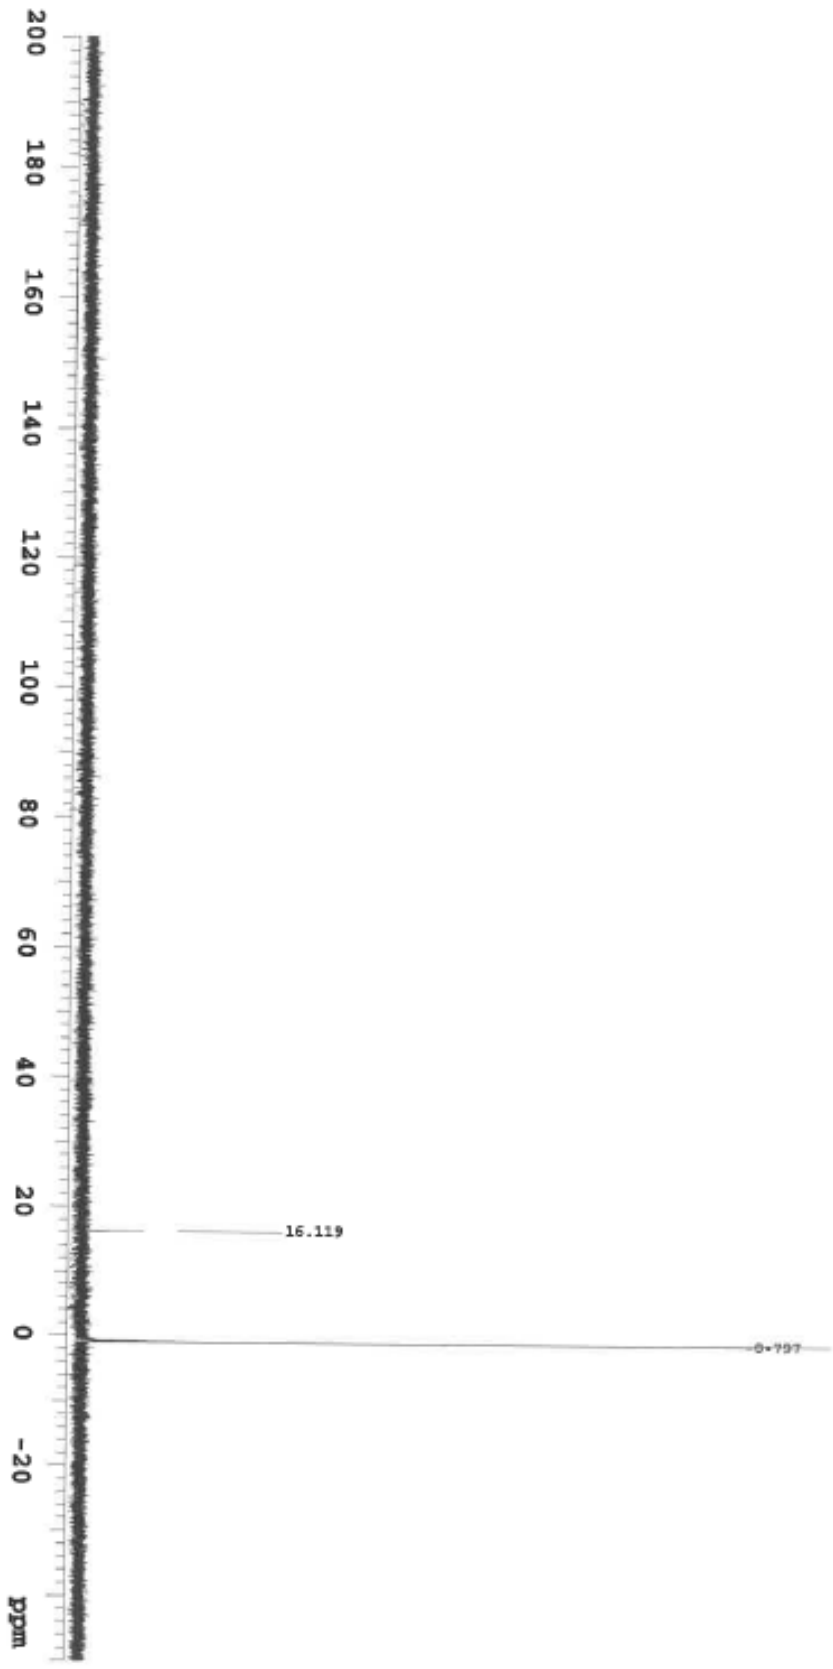



## Millennium HPLC Information

Sample: B-15-FINAL

Run Time: 30.00 Minutes

Operator: Caitlin

Solvent System:

Column: Phenom Synergi Fusion C18 4u 4.6 x 250 mm

Channel Description: PDA 286.0 nm

Flow Rate: 1.0 ml/min

Date: 3/25/2021 1:40:12 PM PST

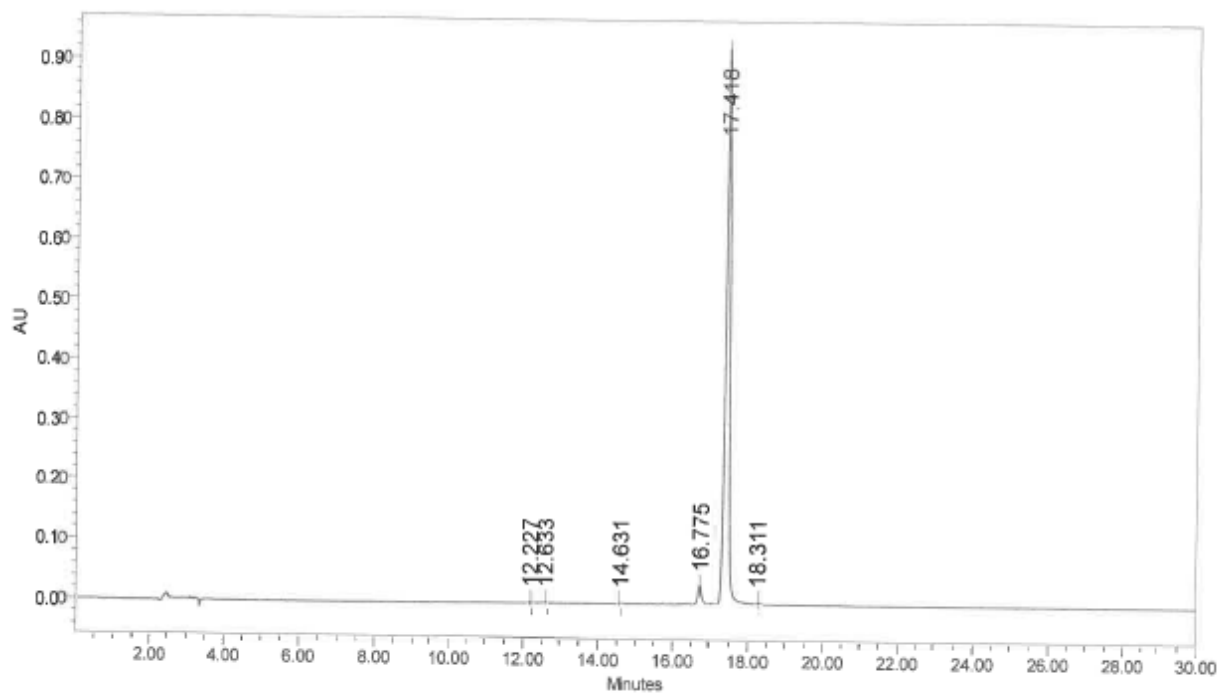

### Peak Results

|   | RT     | Height | Area    | % Area |
|---|--------|--------|---------|--------|
| 1 | 12.227 | 665    | 2658    | 0.04   |
| 2 | 12.633 | 743    | 2912    | 0.04   |
| 3 | 14.631 | 1107   | 3743    | 0.05   |
| 4 | 16.775 | 30250  | 222202  | 3.00   |
| 5 | 17.418 | 918575 | 7168714 | 96.71  |
| 6 | 18.311 | 2195   | 12190   | 0.16   |

RT: 0.00 - 10.00 SM: 7B

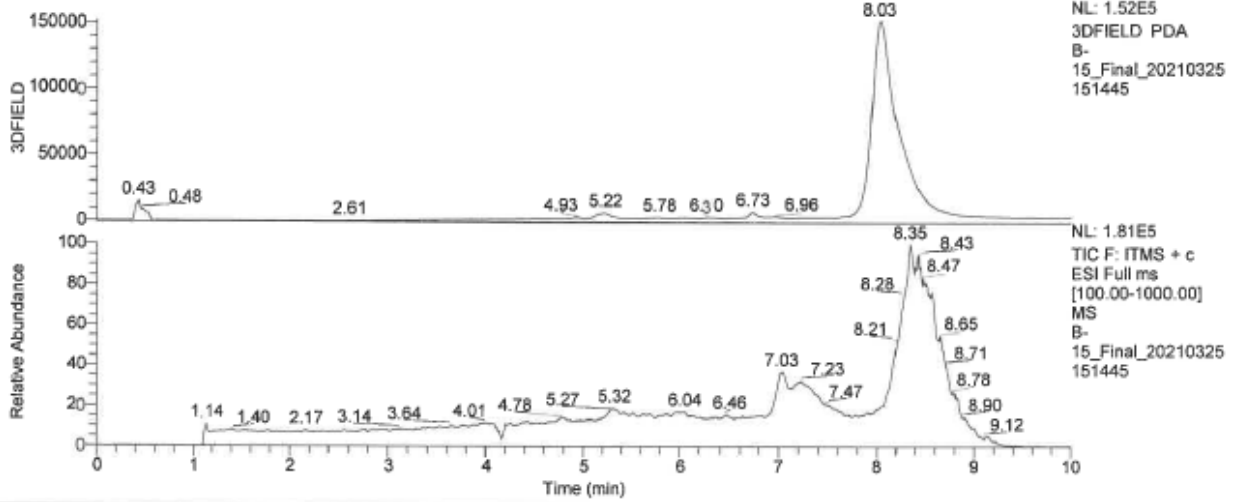

B-15\_Final\_20210325151445 #1480-1598 RT: 8.10-8.74 AV: 119 NL: 6.38E4  
F: ITMS + c ESI Full ms [100.00-1000.00]

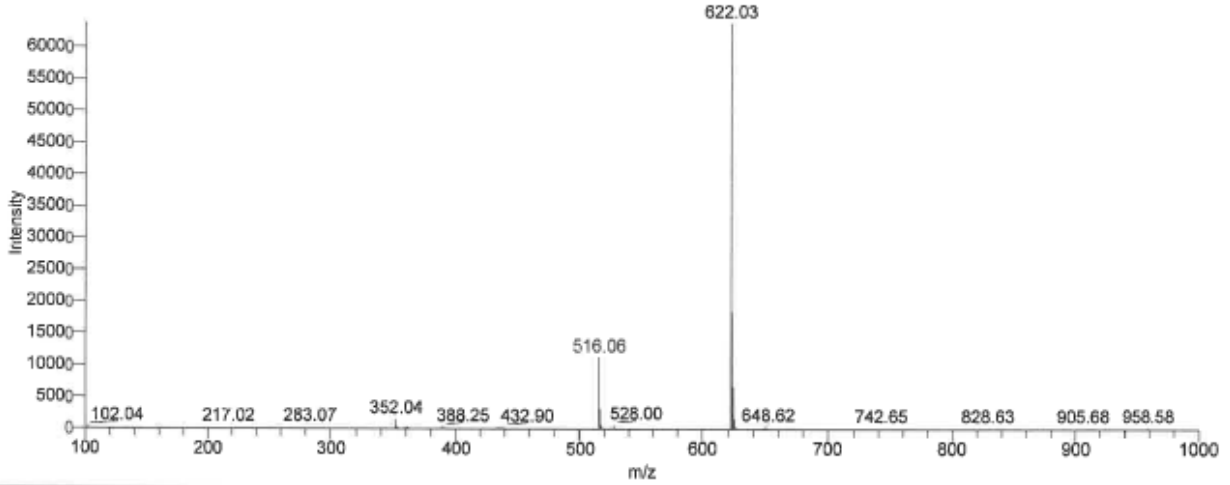

B-15\_Final\_20210325151445 #937-1001 RT: 7.81-8.34 AV: 65 NL: 2.60E5 microAU

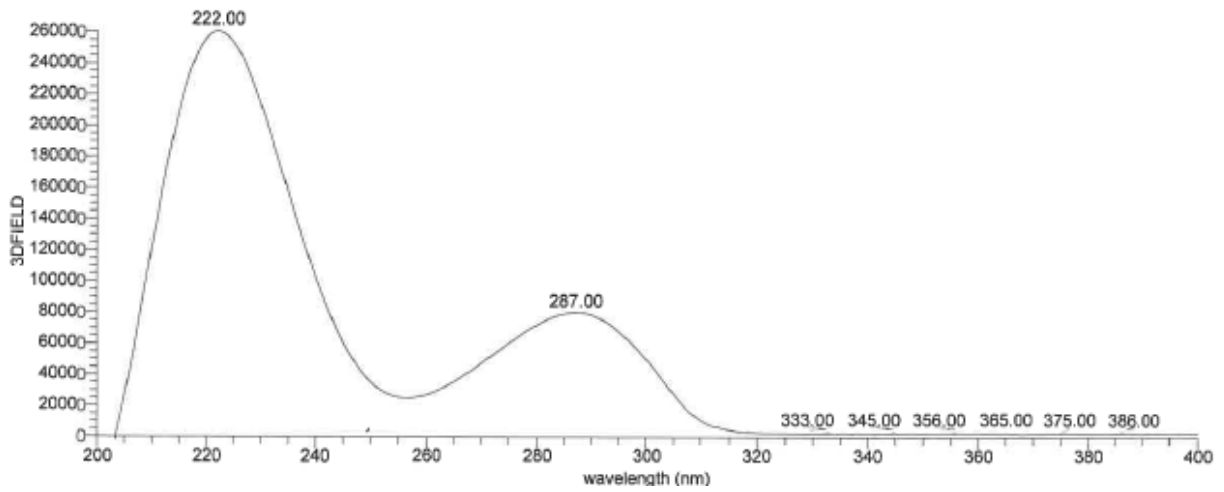

Supplement: mp2c00668_si_001.pdf [file mp2c00668_si_001.pdf]
